# Supplementary material
Source: MDPI journal article supplement (https://www.mdpi.com/1424-8247/15/1/21)
Supplement: s1 [file s1]

# Atazanavir Is a Competitive Inhibitor of SARS-CoV-2 M<sup>pro</sup>, Impairing Variants Replication In Vitro and In Vivo

Otávio Augusto Chaves <sup>1,2,\*</sup>, Carolina Q. Sacramento <sup>1,2,†</sup>, André C. Ferreira <sup>1,2,3,†</sup>, Mayara Mattos <sup>1,2,†</sup>, Natalia Fintelman-Rodrigues <sup>1,2</sup>, Jairo R. Temerozo <sup>4,5</sup>, Leonardo Vazquez <sup>1</sup>, Douglas Pereira Pinto <sup>6</sup>, Gabriel P. E. da Silveira <sup>6</sup>, Laís Bastos da Fonseca <sup>6</sup>, Heliana Martins Pereira <sup>6</sup>, Aluana Santana Carlos <sup>3</sup>, Joana C. d'Ávila <sup>1,3</sup>, João P. B. Viola <sup>7</sup>, Robson Q. Monteiro <sup>8</sup>, Patrícia T. Bozza <sup>1</sup>, Hugo Caire Castro-Faria-Neto <sup>1</sup> and Thiago Moreno L. Souza <sup>1,2,\*</sup>

Laboratory of Immunopharmacology, Oswaldo Cruz Institute (IOC), Oswaldo Cruz Foundation (Fiocruz), Rio de Janeiro, RJ, 21040-360, Brazil; carol.qsacramento@gmail.com (C.Q.S.); andre.bio2009@gmail.com (A.C.F.); maymattos03@gmail.com (M.M.); nataliafintelman@gmail.com (N.F.-R.); leonardo\_vazquez@hotmail.com (L.V.); joanacpdavila@gmail.com (J.C.d'Á.); pbozza@gmail.com (P.T.B.); hugocfneto@gmail.com (H.C.C.-F.-N.)

<sup>2</sup> National Institute for Science and Technology on Innovation on Neglected Diseases Neglected Populations (INCT/IDNP), Center for Technological Development in Health (CDTS), Oswaldo Cruz Foundation (Fiocruz), Rio de Janeiro, RJ, 21040-900, Brazil

<sup>3</sup> Preclinical Research Laboratory, Universidade Iguaçu—UNIG, Nova Iguaçu, RJ, 26260-045, Brazil; aluanasc@gmail.com

<sup>4</sup> Laboratory on Thymus Research, Oswaldo Cruz Institute (IOC), Oswaldo Cruz Foundation (Fiocruz), Rio de Janeiro, RJ, 21040-900, Brazil; jairo.jrt@gmail.com

<sup>5</sup> National Institute for Science and Technology on Neuroimmunomodulation (INCT/NIM), Oswaldo Cruz Institute (IOC), Oswaldo Cruz Foundation (Fiocruz), Rio de Janeiro, RJ, 21040-900, Brazil

<sup>6</sup> Laboratory of Pharmacokinetics, Vice Presidency of Research, and Innovation in Health—Oswaldo Cruz Foundation (Fiocruz), Rio de Janeiro, RJ, 21040-900, Brazil; douglas.pinto@fiocruz.br (D.P.P.); gabriel.silveira@fiocruz.br (G.P.E.d.S.); lais.fonseca@fiocruz.br (L.B.d.F.); heliana.pereira@fiocruz.br (H.M.P.)

<sup>7</sup> Program of Immunology and Tumor Biology, Brazilian National Cancer Institute (INCA), Rua André Cavalcanti 37, 5th floor, Centro, Rio de Janeiro, RJ, 20231-050, Brazil; jpviola@inca.gov.br

<sup>8</sup> Institute of Medical Biochemistry Leopoldo de Meis, Federal University of Rio de Janeiro, Rio de Janeiro, RJ, 21941-902, Brazil; robsonqm@bioqmed.ufrj.br

\* Correspondence: otavioaugustochaves@gmail.com (O.A.C.); tmoreno@cdts.fiocruz.br (T.M.L.S.)

† These authors contributed equally to this work.

**Citation:** Chaves, O.A.; Sacramento, C.Q.; Ferreira, A.C.; Mattos, M.; Fintelman-Rodrigues, N.; Temerozo, J.R.; Vazquez, L.; Pinto, D.P.; da Silveira, G.P.E.; da Fonseca, L.B.; et al. Atazanavir is a Competitive Inhibitor of SARS-CoV-2 M<sup>pro</sup>, Impairing Variants Replication In Vitro and In Vivo. *Pharmaceuticals* **2022**, *15*, 21. <https://doi.org/10.3390/ph15010021>

Academic Editor(s): Jean Jacques Vanden Eynde; Annie Mayence

Received: 29 November 2021

Accepted: 20 December 2021

Published: 24 December 2021

**Publisher's Note:** MDPI stays neutral with regard to jurisdictional claims in published maps and institutional affiliations.

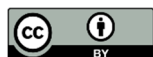

**Copyright:** © 2021 by the authors. Licensee MDPI, Basel, Switzerland. This article is an open access article distributed under the terms and conditions of the Creative Commons Attribution (CC BY) license (<https://creativecommons.org/licenses/by/4.0/>).

**Abstract:** Atazanavir (ATV) has already been considered as a potential repurposing drug to 2019 coronavirus disease (COVID-19); however, there are controversial reports on its mechanism of action and effectiveness as anti-severe acute respiratory syndrome coronavirus 2 (SARS-CoV-2). Through the pre-clinical chain of experiments: enzymatic, molecular docking, cell-based and in vivo assays, it is demonstrated here that both SARS-CoV-2 B.1 lineage and variant of concern gamma are susceptible to this antiretroviral. Enzymatic assays and molecular docking calculations showed that SARS-CoV-2 main protease (M<sup>pro</sup>) was inhibited by ATV, with Morrison's inhibitory constant ( $K_i$ ) 1.5-fold higher than GC376 (a positive control) dependent of the catalytic water ( $H_2O_{cat}$ ) content. ATV was a competitive inhibitor, increasing the M<sup>pro</sup>'s Michaelis–Menten ( $K_m$ ) more than sixfold. Cell-based assays indicated that different lineages of SARS-CoV-2 is susceptible to ATV. Using oral administration of ATV in mice to reach plasmatic exposure similar to humans, transgenic mice expression in human angiotensin converting enzyme 2 (K18-hACE2) were partially protected against lethal challenge with SARS-CoV-2 gamma. Moreover, less cell death and inflammation were observed in the lung from infected and treated mice. Our studies may contribute to a better comprehension of the M<sup>pro</sup>/ATV interaction, which could pave the way to the development of specific inhibitors of this viral protease.

**Keywords:** SARS-CoV-2; COVID-19; repurposing drugs; atazanavir; protease inhibitor; pharmacokinetics; molecular docking



## **SUPPLEMENTARY MATERIAL**



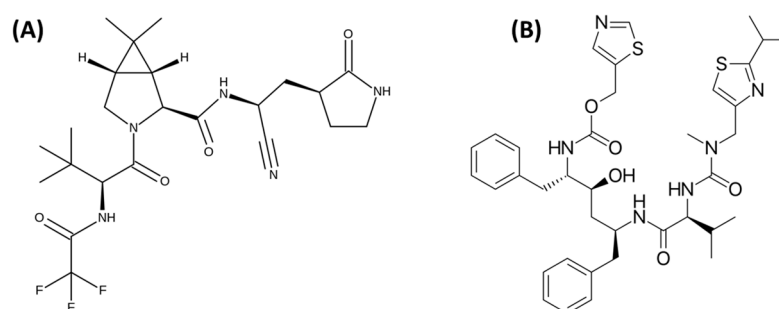

**Figure S1.** Chemical structure for (A) PF-07321332 and (B) ritonavir, the active principles of PAXLOVID™ from Pfizer.

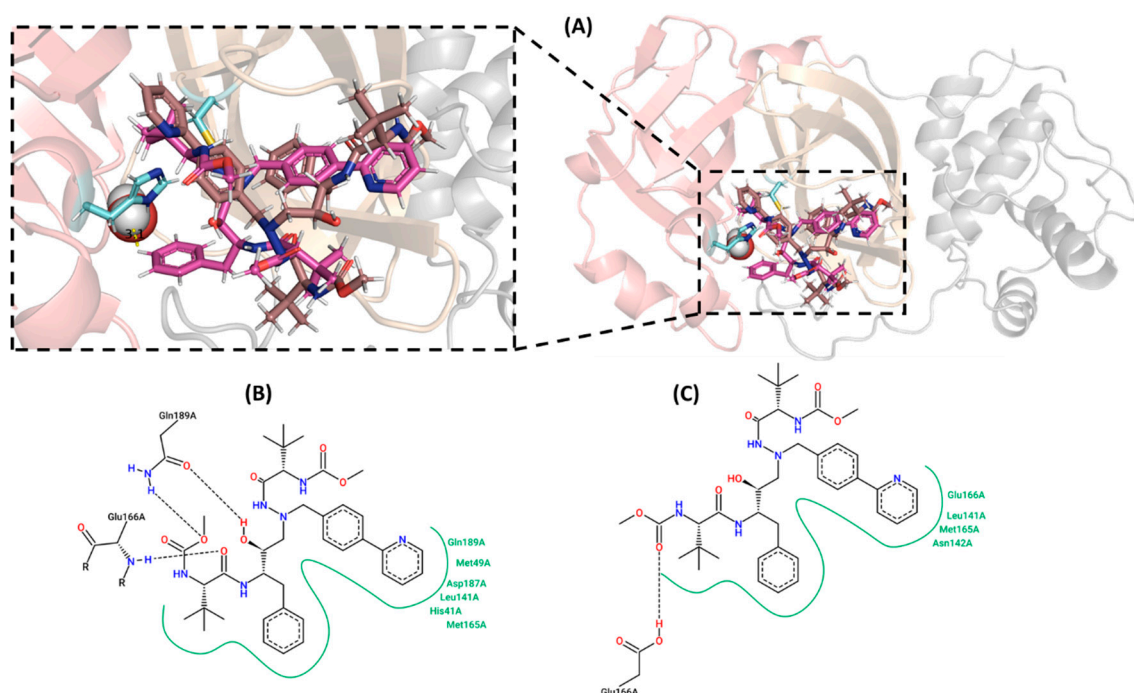

**Figure S2.** (A) Superposition of the best docking pose for the interaction between M<sup>pro</sup> and ATV in the presence and without the catalytic water H<sub>2</sub>O<sub>cat</sub> (ATV in pink and brown, respectively). The 2D-plot image for the interaction among the amino acid residues from the catalytic pocket of M<sup>pro</sup> with (B) ATV in the presence of H<sub>2</sub>O<sub>cat</sub> and (C) ATV without H<sub>2</sub>O<sub>cat</sub>. For better interpretation the M<sup>pro</sup> structure was represented only in the monomeric form with the domains I, II, and III in light red, orange, and gray, respectively. The catalytic dyad His-41 and Cys-145 are represented as sticks in cyan, while the amino acid residues which interact hydrophobically with ATV are in green in the 2D-plot image.



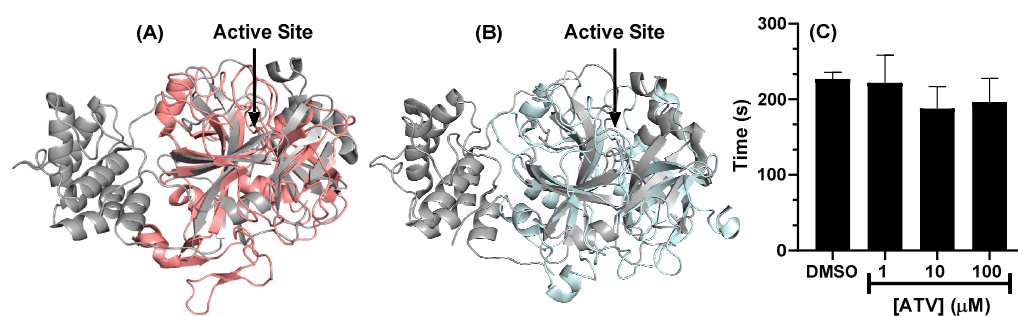

**Figure S3.** Superposition of the monomeric unit of M<sup>pro</sup> (in gray, PDB code 7K40) with (A) FXa (in salmon, PDB code 2P16) and (B) thrombin (in cyan, PDB code 1KTS). For better interpretation the catalytic water (H<sub>2</sub>O<sub>cat</sub>) of M<sup>pro</sup> is not shown. (C) Fibrin formation trial without and in the presence of three concentrations of ATV.

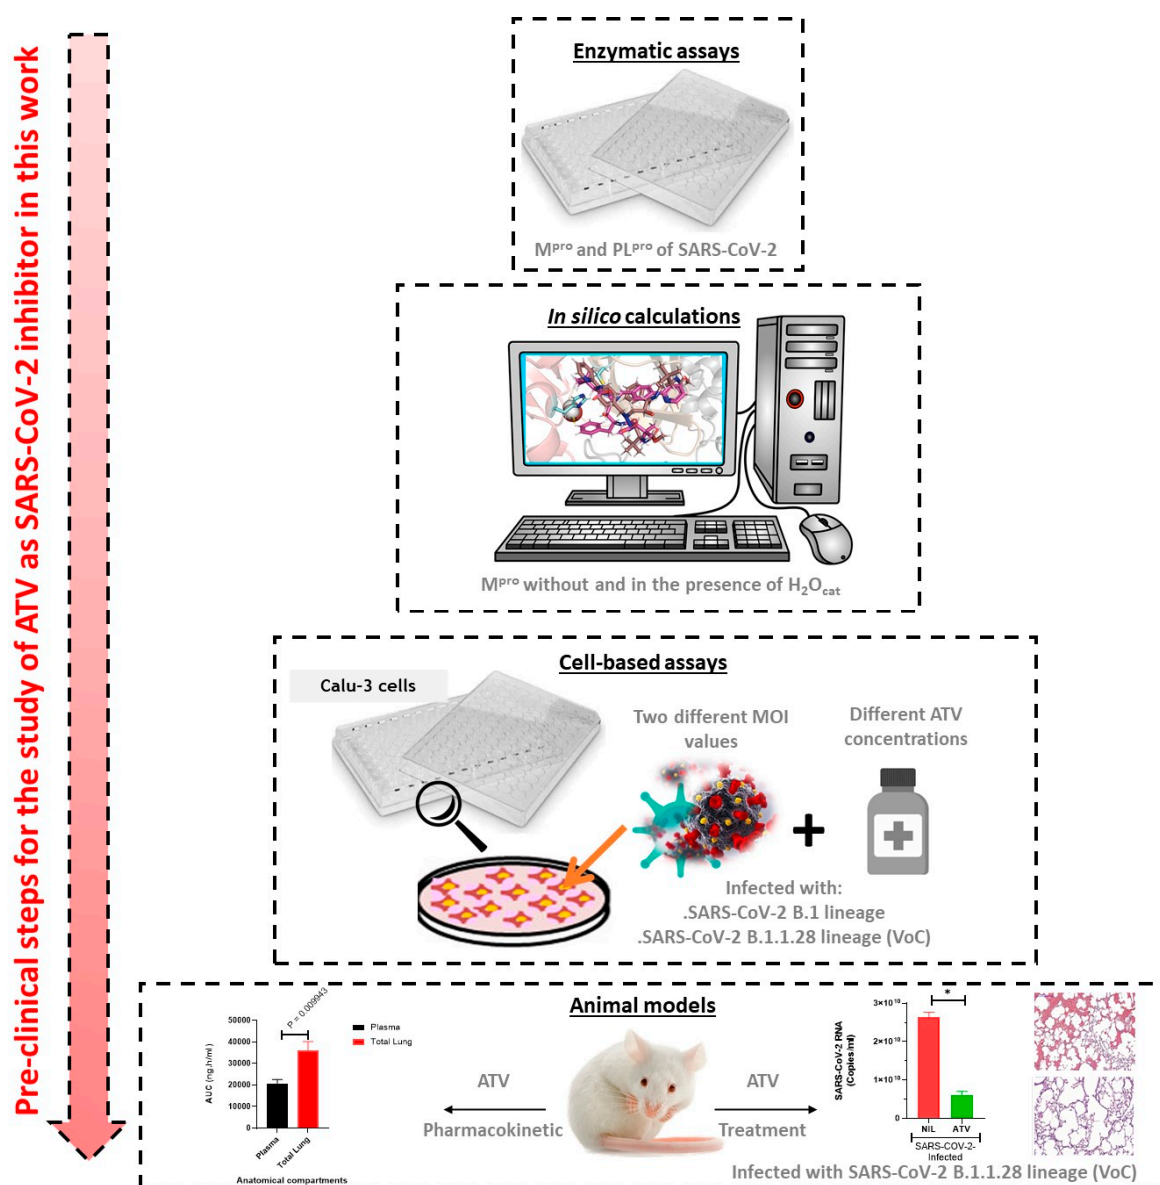

**Figure S4.** The flow charge indicating the main steps of the present work.
